# Supplementary material for: Photoinitiator-free light-mediated crosslinking of dynamic polymer and pristine protein networks
Source: Royal Society of Chemistry journal article supplement (doi:10.1039/d4bm00849a), 2024-11-12
Supplement: d4bm00849a1.pdf [file d4bm00849a1.pdf]

## SUPPLEMENTARY INFORMATION

### **Photoinitiator-free light-mediated crosslinking of dynamic polymer and pristine protein networks**

Riccardo Rizzo,<sup>a,b</sup> Dylan M. Barber,<sup>b</sup> Jackson K. Wilt,<sup>b</sup> Alexander J. Ainscough,<sup>a,b</sup> and Jennifer A. Lewis<sup>a,b</sup>

<sup>a</sup>Wyss Institute for Biologically Inspired Engineering, Harvard University, Boston, MA 02115.

<sup>b</sup>Harvard John A. Paulson School of Engineering and Applied Sciences, Harvard University, Cambridge, MA 02138.

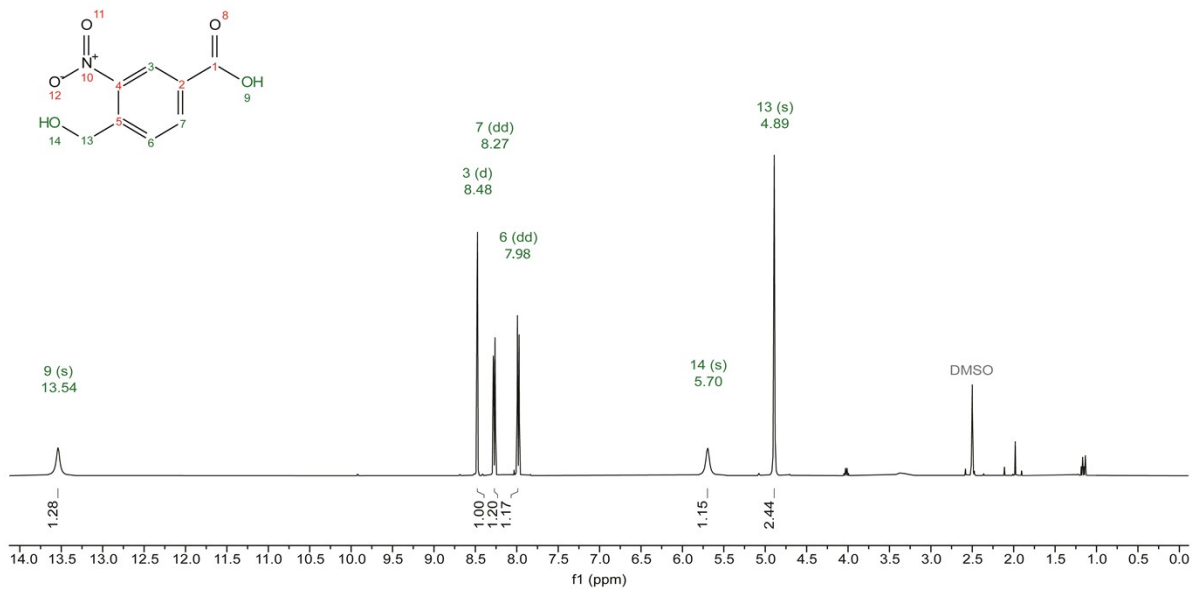

Figure S1. 4-(Hydroxymethyl)-3-nitrobenzoic acid (oNBA) <sup>1</sup>H NMR in DMSO-d<sub>6</sub>.

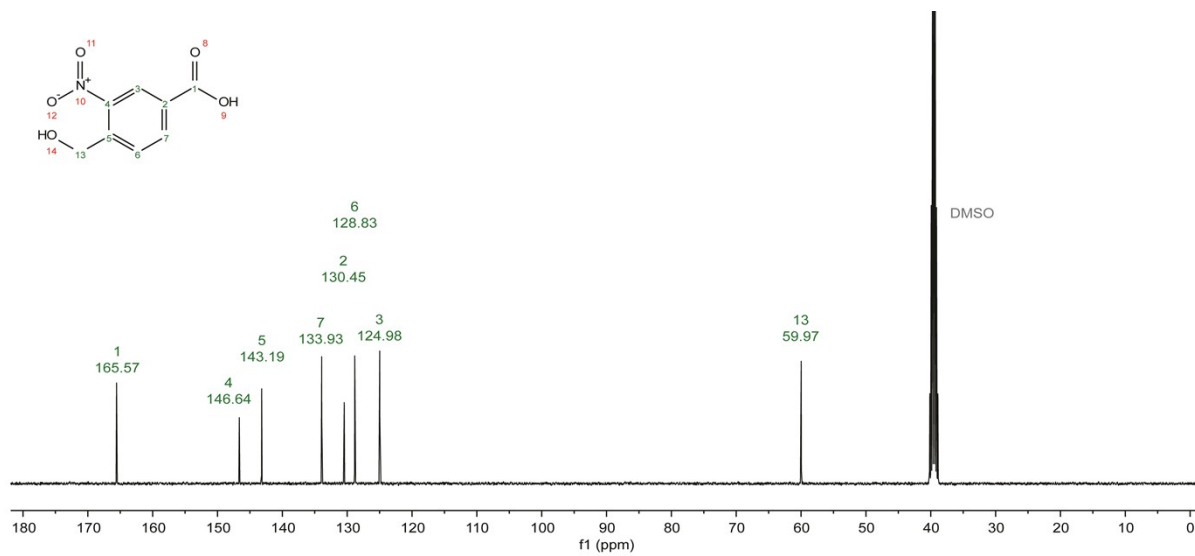

**Figure S2.** 4-(Hydroxymethyl)-3-nitrobenzoic acid (oNBA) <sup>13</sup>C NMR in DMSO-d<sub>6</sub>.

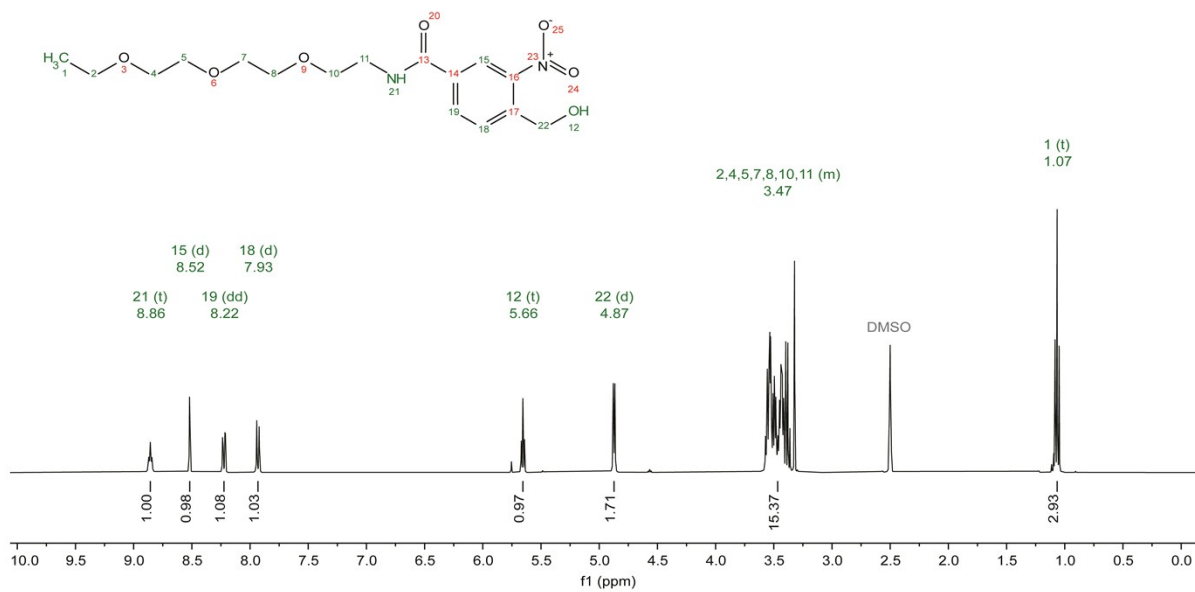

**Figure S3.** Monofunctional *o*NBA (m-*o*NBA) <sup>1</sup>H NMR in DMSO-d<sub>6</sub>.

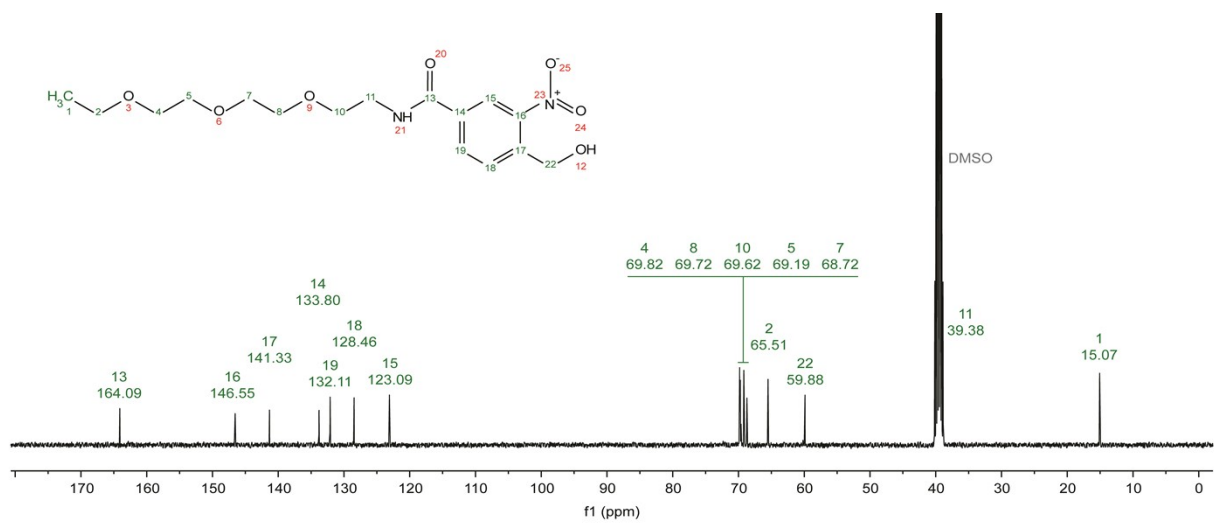

**Figure S4.** Monofunctional *o*NBA (m-*o*NBA)  $^{13}\text{C}$  NMR in  $\text{DMSO-d}_6$ .

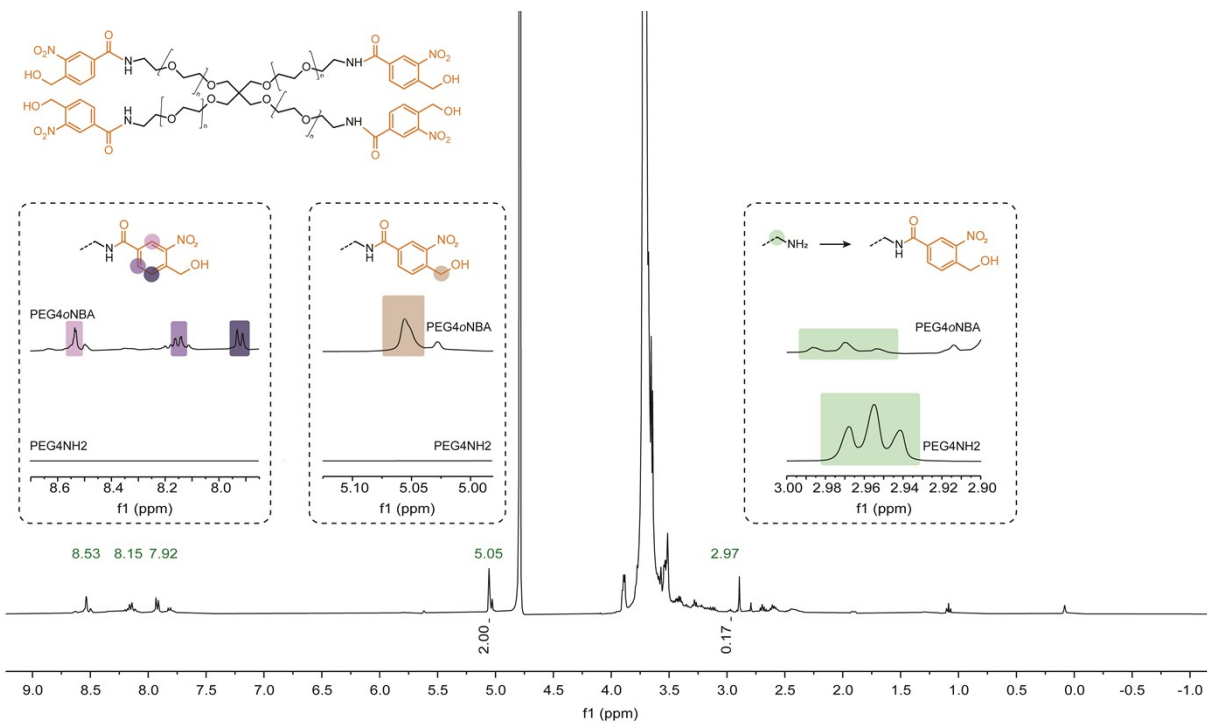

**Figure S5.**  $^1\text{H}$  NMR of *o*NBA modified 4-arm PEG (PEG4*o*NBA) in  $\text{D}_2\text{O}$  revealing the presence of characteristic *o*NBA aromatic (purple highlights, details in left box) and  $\text{CH}_2\text{-OH}$  protons (brown highlight, middle box). The  $\text{CH}_2\text{-OH}$  integral ( $\sim 5.05$  ppm) is compared with the terminal methylene protons of PEG4NH $_2$  at  $\sim 2.97$  ppm ( $\text{CH}_2\text{-NH}_2$ , green highlight in right box) to determine the *o*NBA substitution degree ( $\sim 92\%$ ).

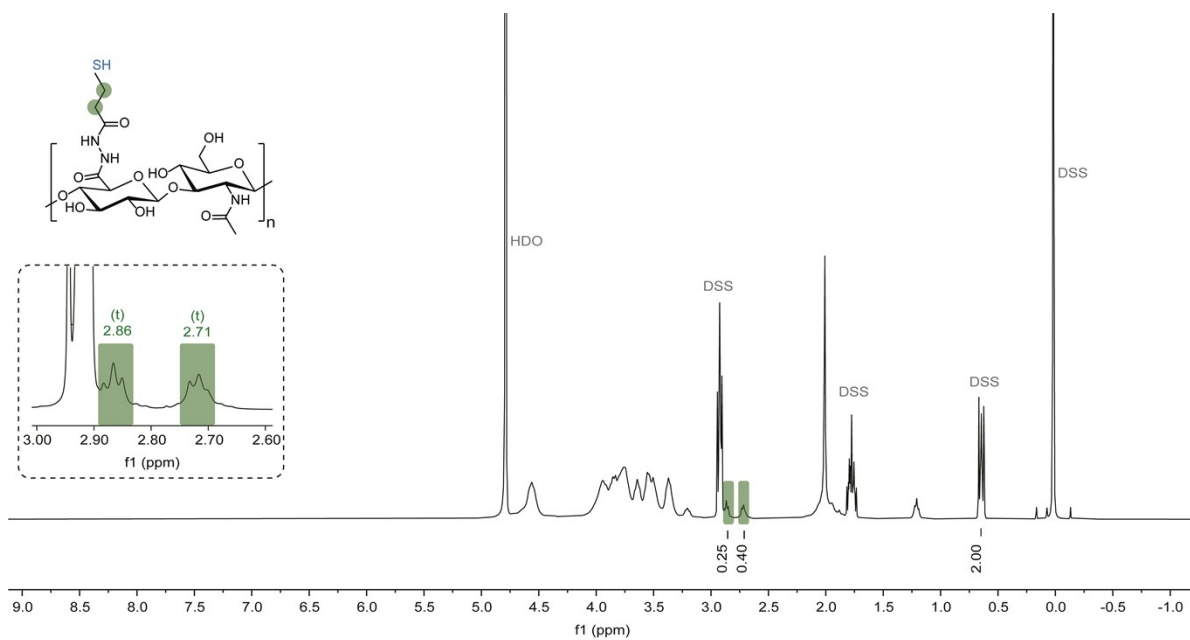

**Figure S6.** <sup>1</sup>H NMR of thiolated hyaluronic acid (HA-SH) in D<sub>2</sub>O and in the presence of 3-(trimethylsilyl)-1-propanesulfonic acid (DSS), an internal standard. Highlighted in green are the methylene protons signals of grafted 3,3'-dithiobis(propionohydrazide) (DTPHY) used for quantification of the degree of substitution.

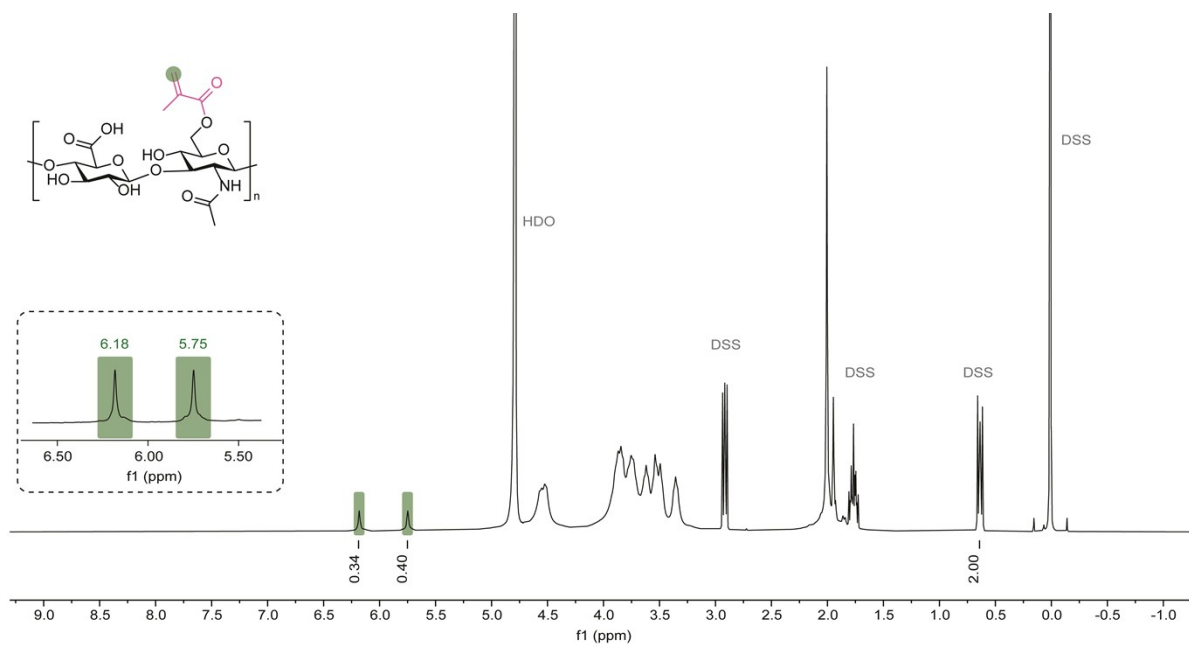

**Figure S7.** <sup>1</sup>H NMR of methacrylated hyaluronic acid (HA-MA) in D<sub>2</sub>O, and in the presence of 3-(trimethylsilyl)-1-propanesulfonic acid (DSS) internal standard. Highlighted in green are the characteristic methacrylate protons signals used for the quantification of the degree of substitution.



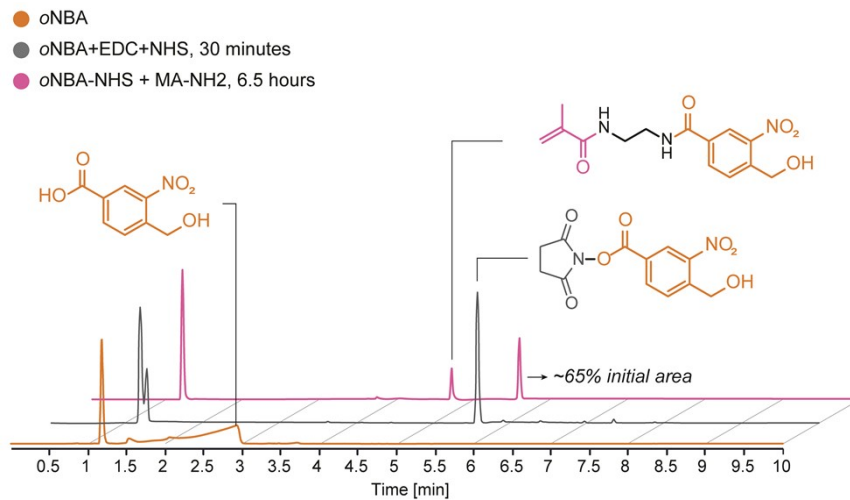

**Figure S8.** HPLC monitoring of oNBA-NHS and oNBA-MA synthesis.

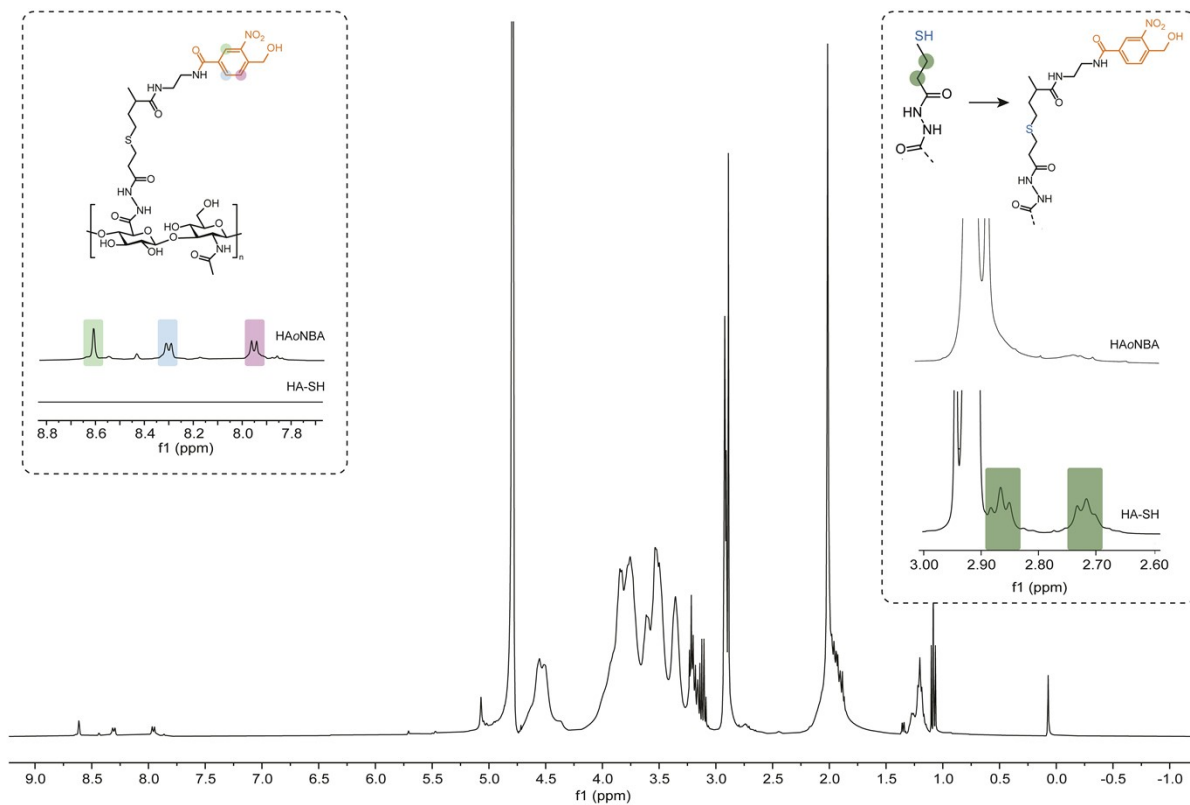

**Figure S9.**  $^1\text{H}$  NMR of *o*NBA-modified hyaluronic acid (HA-*o*NBA) in  $\text{D}_2\text{O}$  revealing the presence of characteristic *o*NBA aromatic protons (green, blue, purple highlight, details in left box), and the consumption of methylene peaks characteristic of thiolated HA (HA-SH) (green highlights, details in right box).

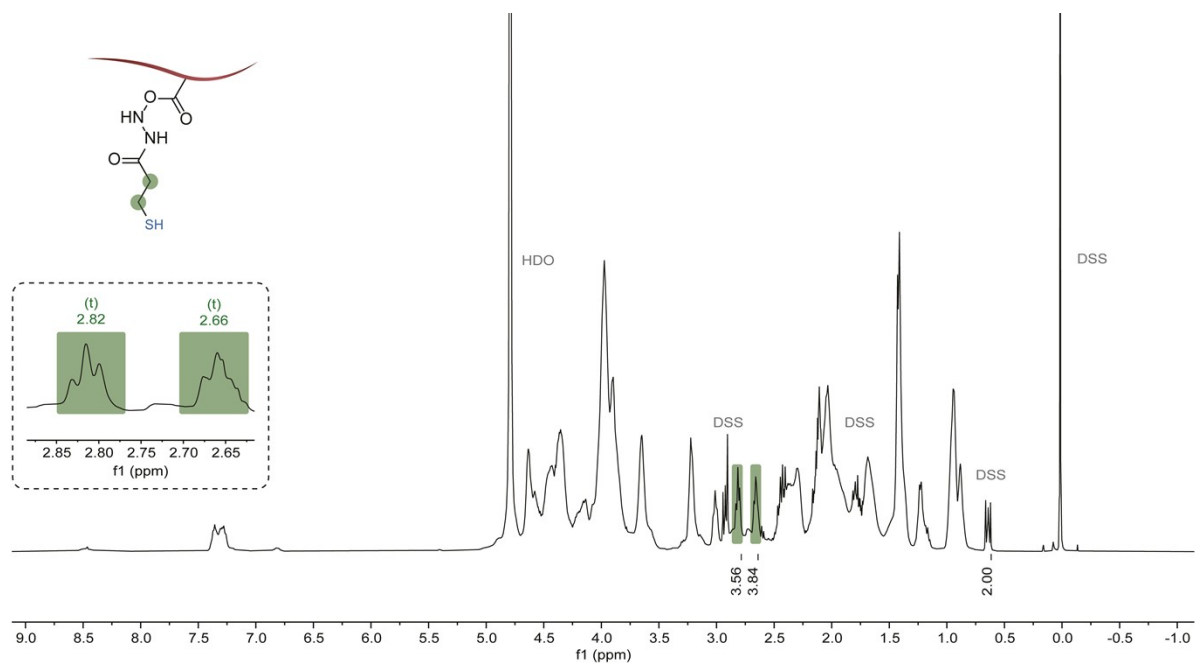

**Figure S10.**  $^1\text{H}$  NMR of thiolated fish gelatin (fGel-SH) in  $\text{D}_2\text{O}$ , and in the presence of 3-(trimethylsilyl)-1-propanesulfonic acid (DSS), an internal standard. Highlighted in green the methylene protons signals of grafted 3,3'-dithiobis(propionohydrazide) (DTPHY) used for quantification of the degree of substitution.

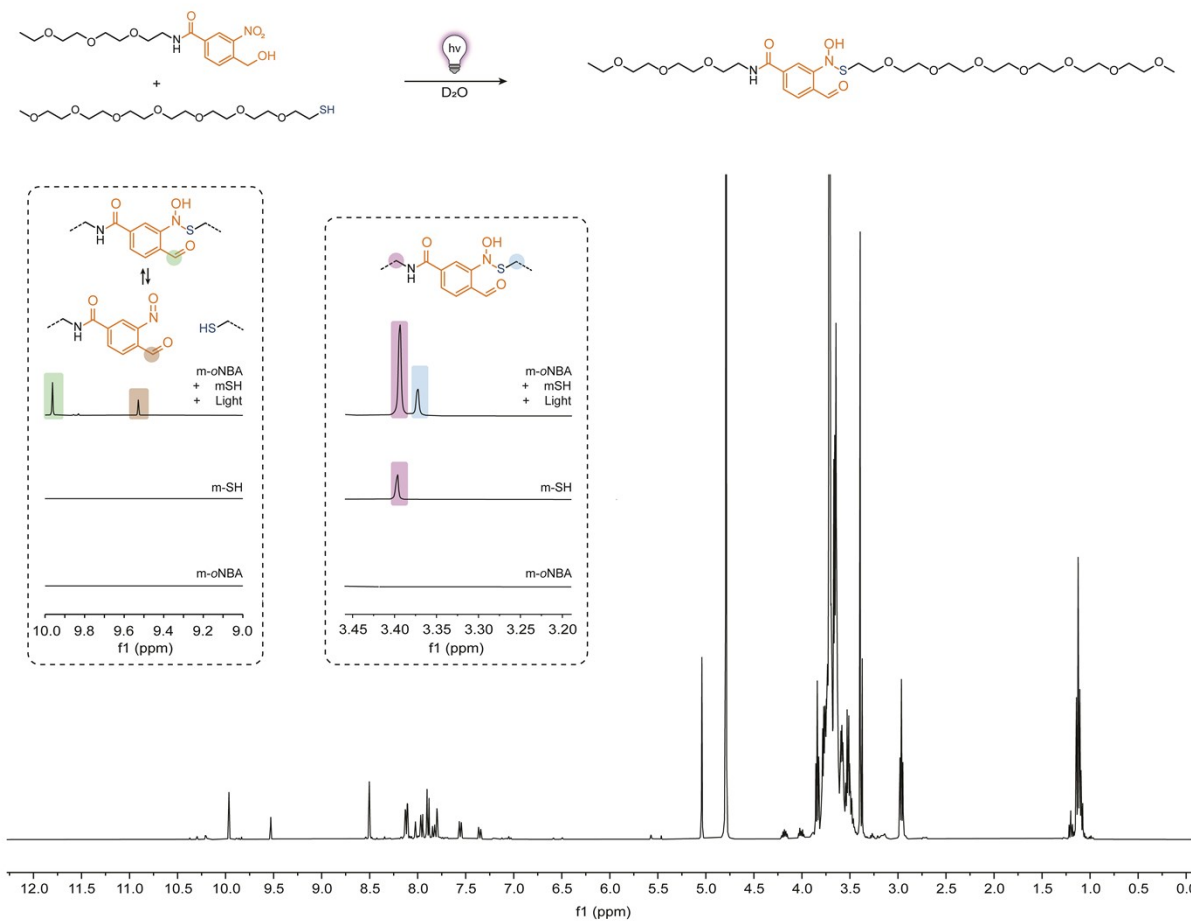

**Figure S11.** <sup>1</sup>H NMR of a 10 mM m-oNBA + 10 mM m-SH solution reacted in D<sub>2</sub>O (365 nm, 20 mW cm<sup>-2</sup> for 15 min) revealing the appearance of benzaldehyde peaks of activated oNBA (brown highlight) and N-semimercaptal adduct (green highlight) (details in left box). A shift of terminal methylene protons of m-SH (CH<sub>2</sub>-SH) is also observed due to the formation of N-semimercaptal bond (blue highlight, details in right box).

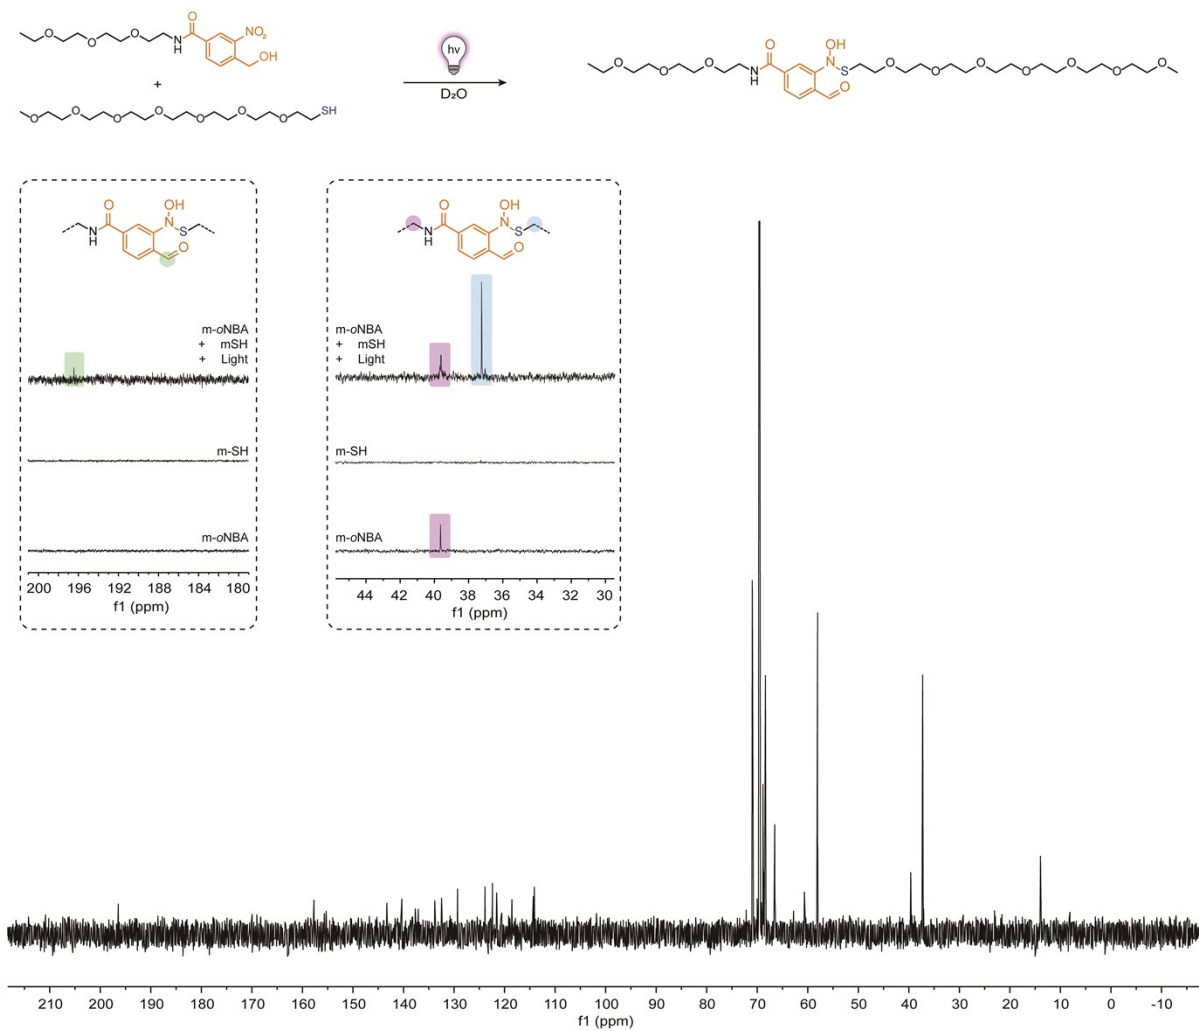

**Figure S12.** <sup>13</sup>C NMR of a 10 mM m-oNBA + 10 mM m-SH solution reacted in D<sub>2</sub>O (365 nm, 20 mW cm<sup>-2</sup> for 15 min) revealing the appearance of benzaldehyde peaks of activated oNBA or N-semimercaptal adduct (green highlight) (details in left box). A shift of terminal methylene carbon of m-SH (CH<sub>2</sub>-SH) is also observed due to the formation of N-semimercaptal bond (blue highlight, details in right box).

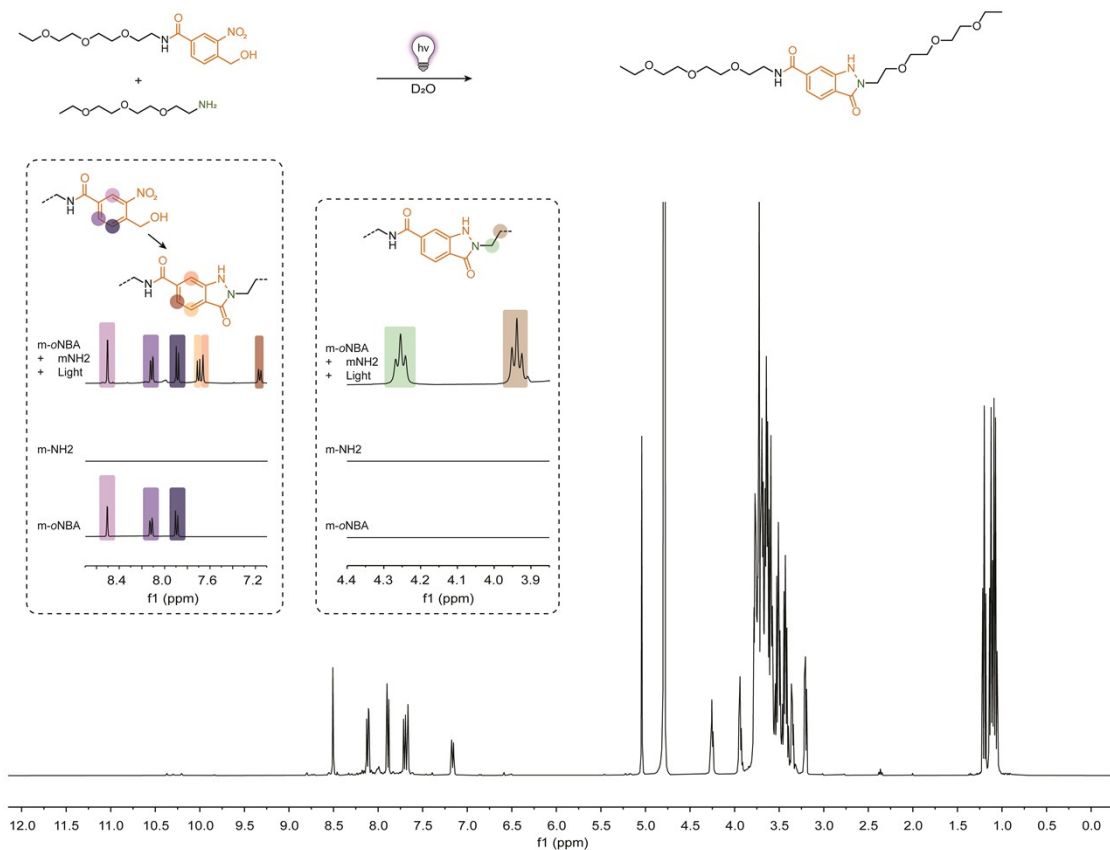

**Figure S13.** <sup>1</sup>H NMR of a 10 mM m-oNBA + 10 mM m-NH<sub>2</sub> solution reacted in D<sub>2</sub>O (365 nm, 20 mW cm<sup>-2</sup> for 15 min) showing shifts of the aromatic protons signals due to the formation of the indazolone bond (purple vs orange highlights, details in left box). Note: No benzaldehyde signals are observed (typical range 9-10 ppm), in accordance with the cyclization process resulting in the formation of an indazolone bond (see Figure 4A). The shifts of terminal methylene protons of m-NH<sub>2</sub> (CH<sub>2</sub>-CH<sub>2</sub>-NH<sub>2</sub>) are observed due to the formation of the indazolone bond (green and brown highlights, details in the right box).

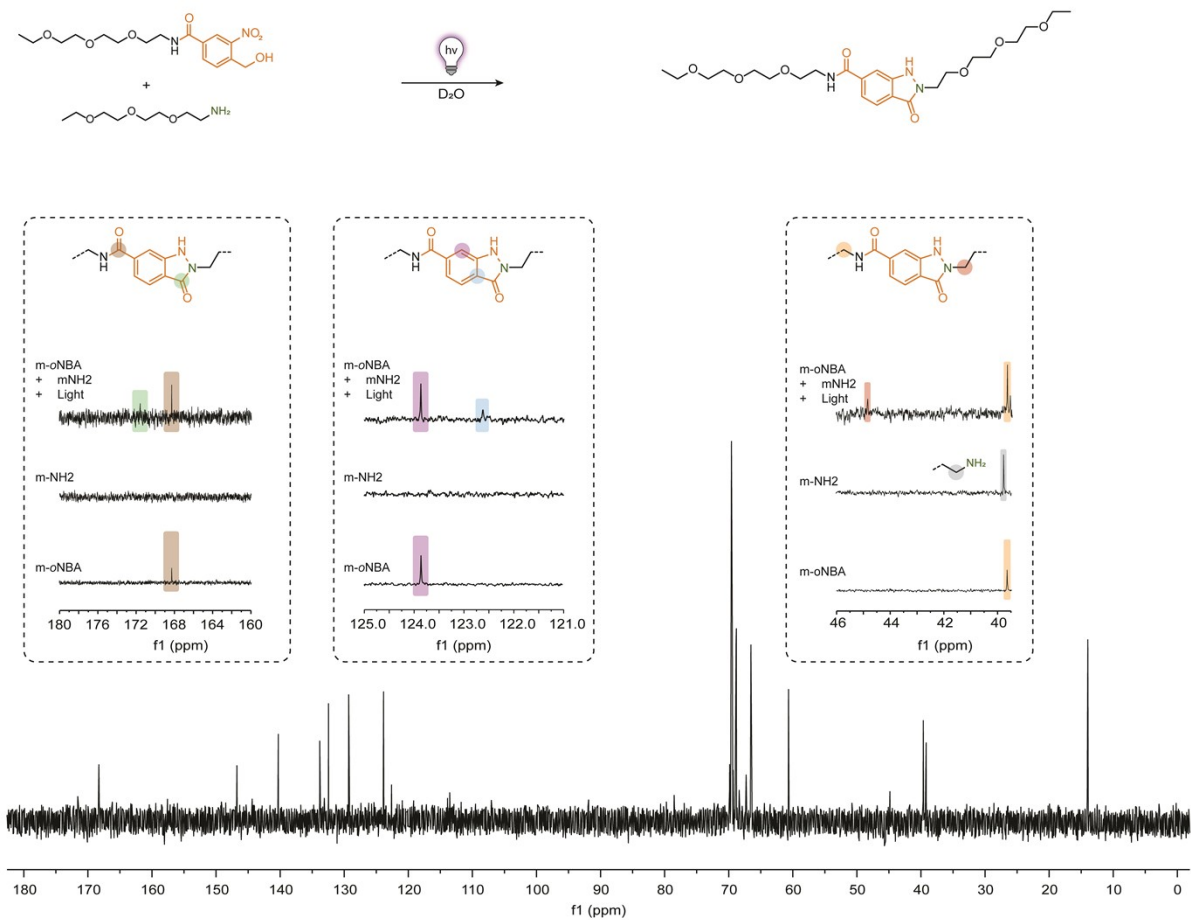

**Figure S14.** <sup>13</sup>C NMR of a 10 mM m-o-NBA + 10 mM m-NH<sub>2</sub> solution reacted in D<sub>2</sub>O (365 nm, 20 mW cm<sup>-2</sup> for 15 min) showing the appearance of the indazolone carbonyl peak (green highlight, left box). A shift of an aromatic carbon was also observed upon reaction (blue highlight, middle box). The terminal methylene carbon signal of m-NH<sub>2</sub> (CH<sub>2</sub>-NH<sub>2</sub>) shifts (grey to red highlight, right box) due to the formation of an indazolone bond.

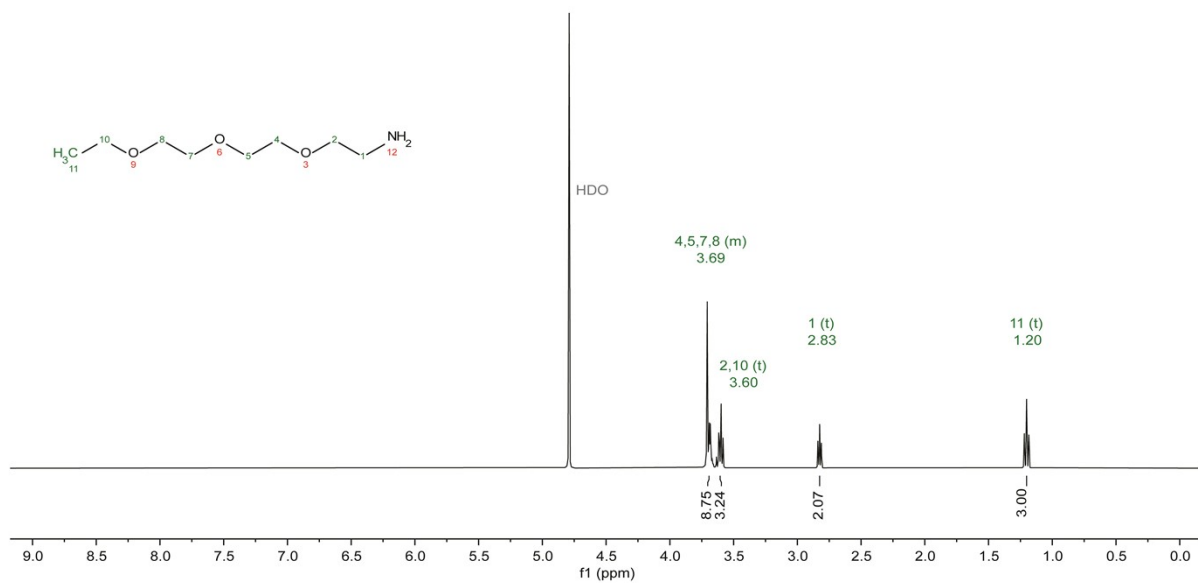

**Figure S15.** 2-(2-(2-ethoxyethoxy)ethoxy)ethanamine (m-NH<sub>2</sub>) <sup>1</sup>H NMR in D<sub>2</sub>O.



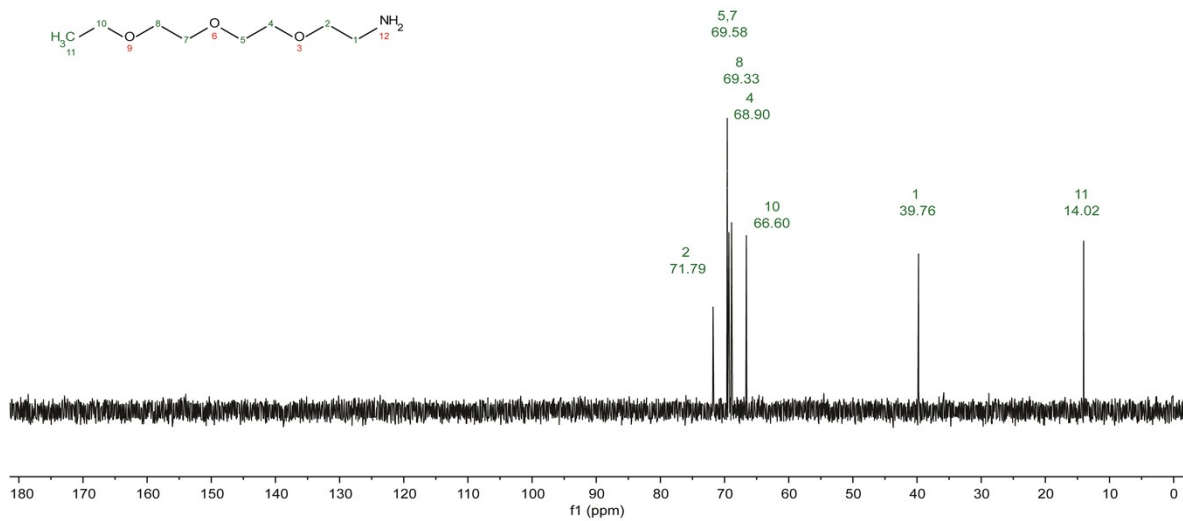

**Figure S16.** 2-(2-(2-ethoxyethoxy)ethoxy)ethanamine (m-NH<sub>2</sub>) <sup>13</sup>C NMR in D<sub>2</sub>O.

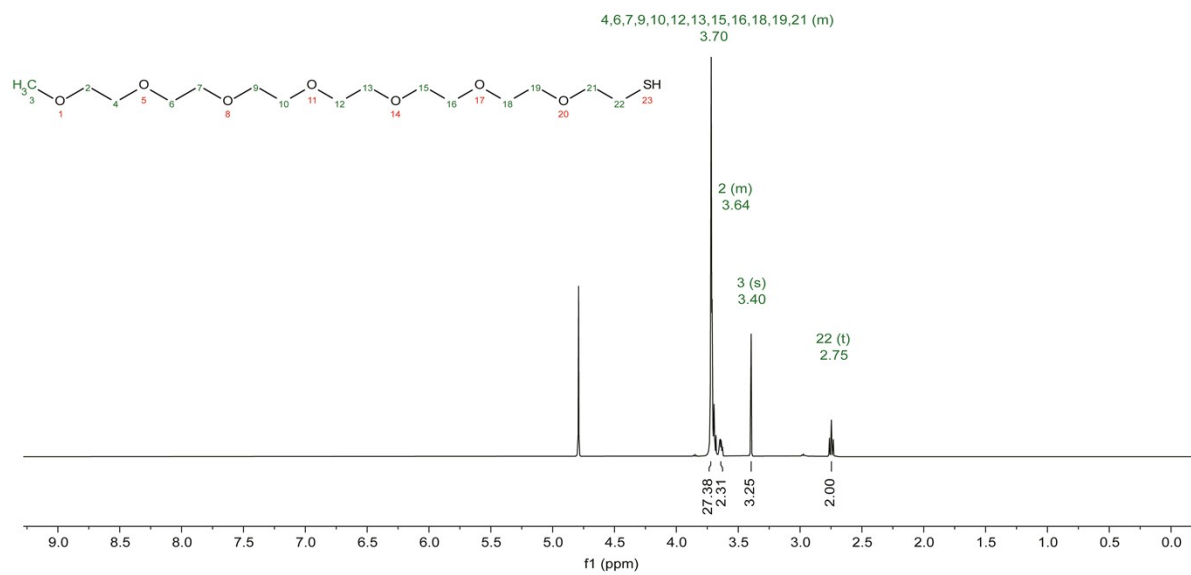

**Figure S17.** O-(2-mercaptoethyl)-O'-methyl-hexa(ethylene glycol) (m-SH) <sup>1</sup>H NMR in D<sub>2</sub>O.

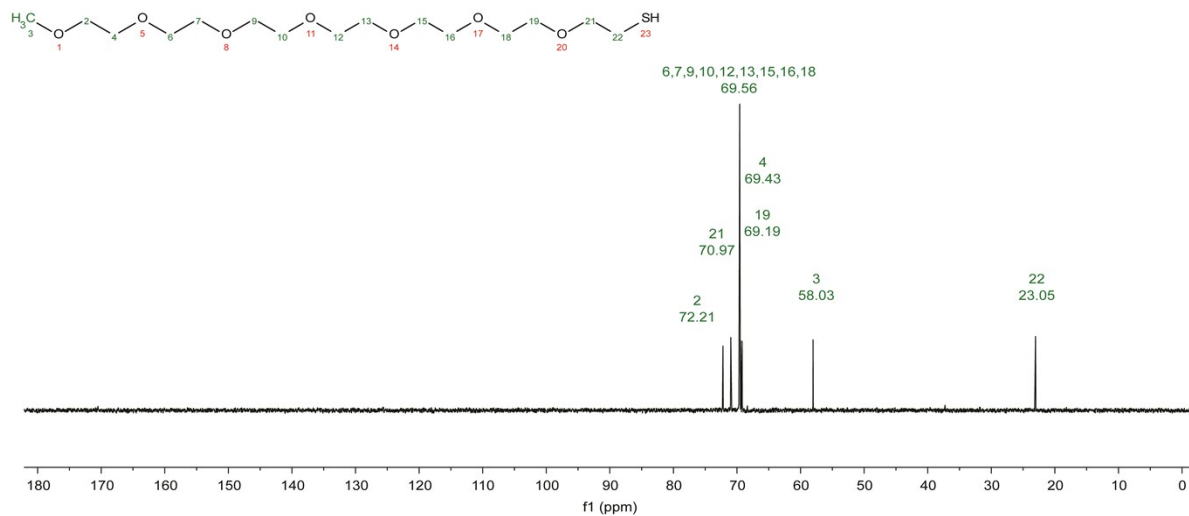

**Figure S18.** O-(2-mercaptoethyl)-O'-methyl-hexa(ethylene glycol) (m-SH) <sup>13</sup>C NMR in D<sub>2</sub>O.

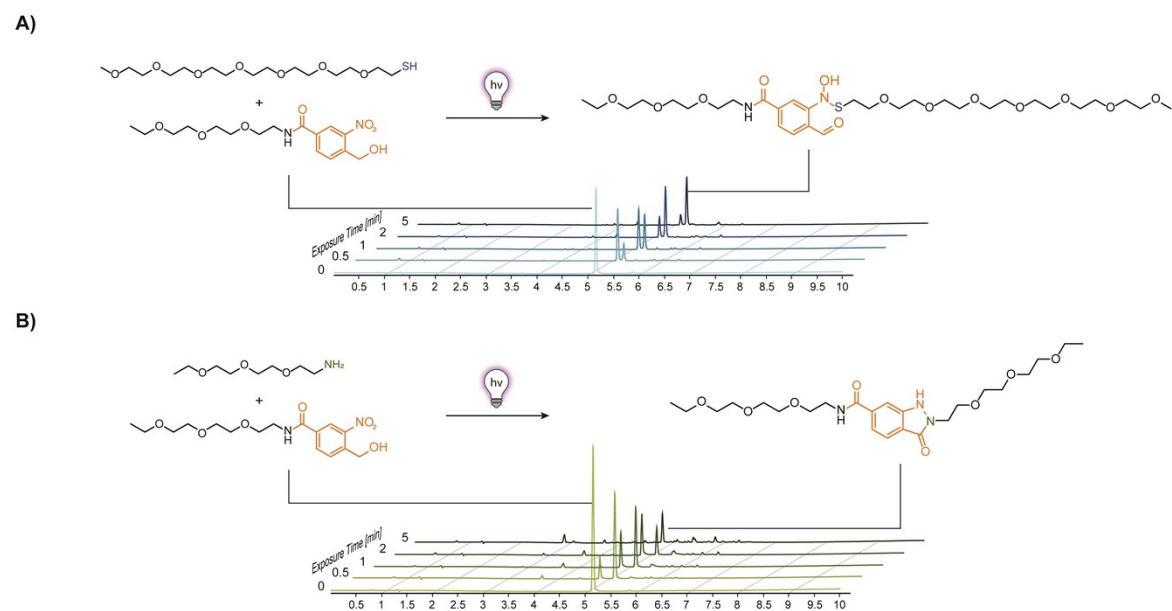

**Figure S19.** HPLC monitoring of 10 mM m-oNBA + 10 mM m-SH reaction (A) and 10 mM m-oNBA + 10 mM m-NH<sub>2</sub> reaction (B) in H<sub>2</sub>O (365 nm, 20 mW cm<sup>-2</sup> for 5 min) revealing consumption of reagents to form N-semimercaptal (A) and indazolone (B) adducts.

## Thiol-*o*NBA photorheology

### I) Concentration

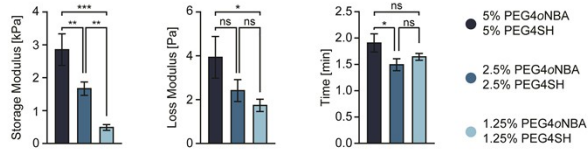

### II) Light intensity

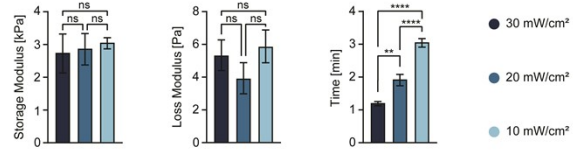

### III) pH

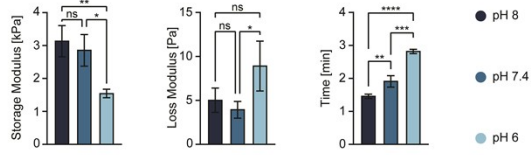

### IV) Ratio

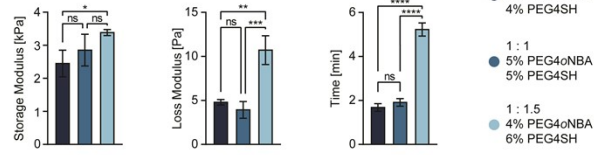

### V) Functionality

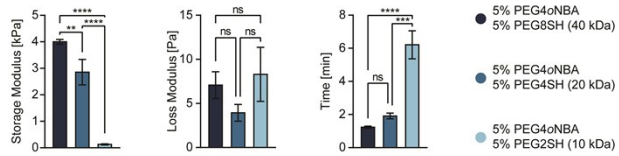

Figure S20. Photorheology of PEG-based thiol-*o*NBA photoresins.

## Amine-*o*NBA photorheology

### I) Concentration

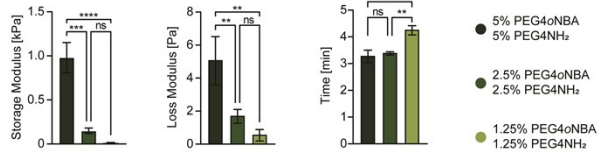

### II) Light intensity

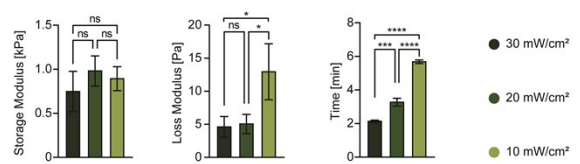

### III) pH

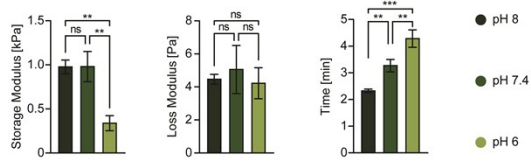

### IV) Ratio

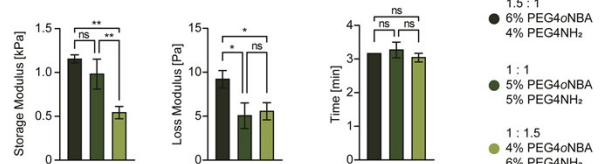

### V) Functionality

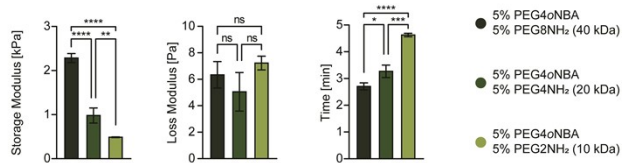

Figure S21. Potorheology of PEG-based amine-*o*NBA photoresins.

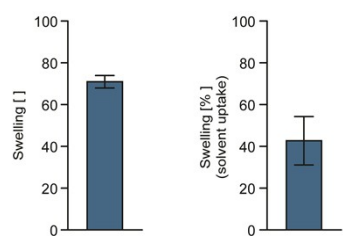

**Figure S22.** Swelling behavior of thiol-*o*NBA photoresin 1.3% PEG4*o*NBA / 1% HA-SH (250 kDa, DS: 10%).

Live / Dead assay

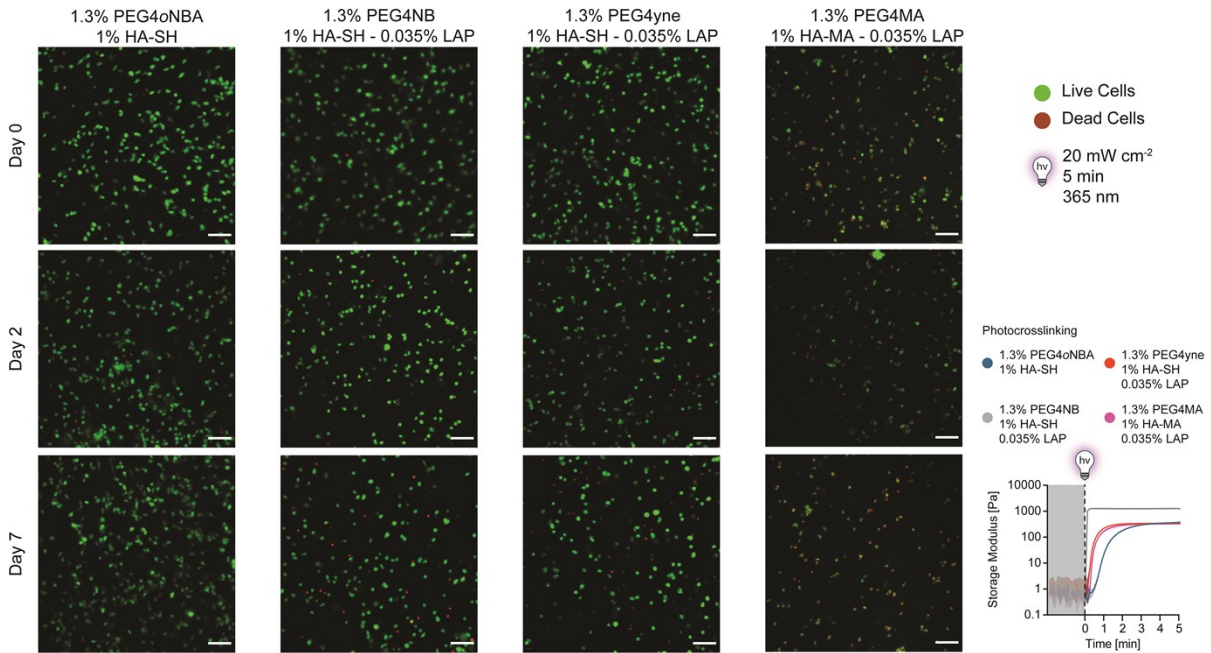

**Figure S23.** Live/dead assay of photocrosslinked bioresins ( $2.5 \text{M cells mL}^{-1}$ , human neonatal dermal fibroblasts) over 1 week of culture. Step-growth chemistries exhibit high cell viability ( $>95\%$ ) upon photocrosslinking (day 0) compared to the chain-growth methacrylated hydrogel ( $\sim 50\%$ ) (see also Figure 3BII). Over 1 week of culture, thiol-*o*NBA maintained the highest viability ( $>95\%$ ), followed by thiol-NB ( $\sim 87\%$ ) and thiol-yne ( $\sim 75\%$ ) chemistries (see also Figure 3BII). By contrast, methacrylate-based resins resulted in lower ( $\sim 50\%$ ) cell viability, due to the generation of reactive oxygen species (ROS, see also Figure 3BI). Photorheology for different photoresins is also shown (bottom right).



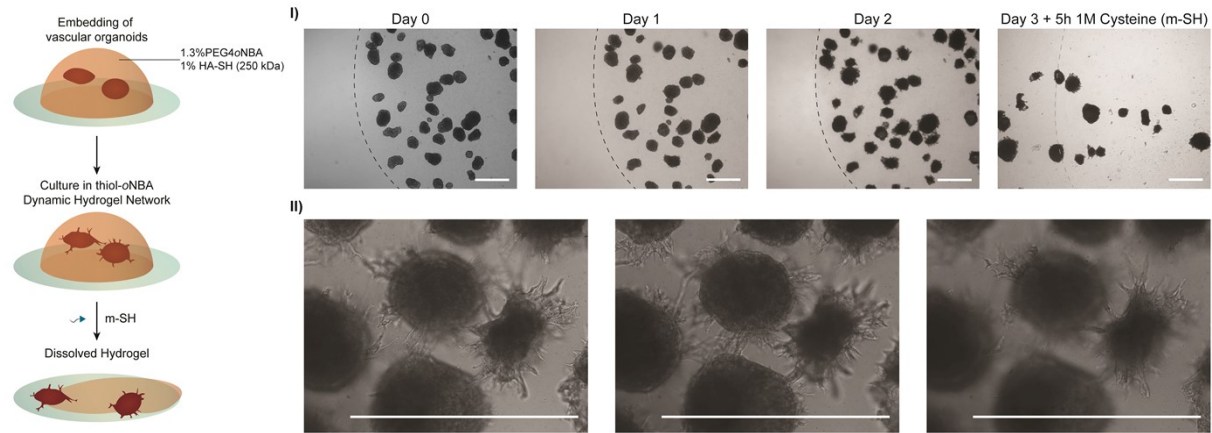

**Figure S24.** Example of thiol- $\alpha$ NBA hydrogel use as a dynamic, transient matrix for vascular organoid culture. Vascular organoids are embedded in 1.3% PEG4 $\alpha$ NBA / 1% HA-SH (DS:10%, 250 kDa) (photocrosslinking conditions: 365 nm, 20 mW cm<sup>-2</sup> for 5 min). After 3 days of culture, the organoids are retrieved by immersing the hydrogel in culture media containing an excess of monofunctional thiols (*i.e.*, cysteine, see also Figure 3C VI) (I). Although lacking integrin cell-adhesion sites, the soft and permissive nature of the matrix, which arises from the dynamic nature of the N-semimercaptal linkages enabled extensive vascular sprouting and spreading after 3 days of culture (II). Scale bars: 500  $\mu$ m.

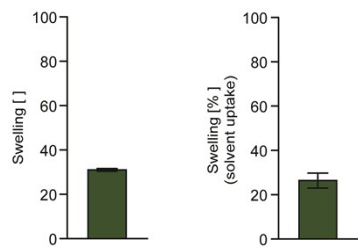

**Figure S25.** Swelling behavior of amine-*o*NBA photoresin 2.5% HA*o*NBA (250 kDa) / 10% fGel.

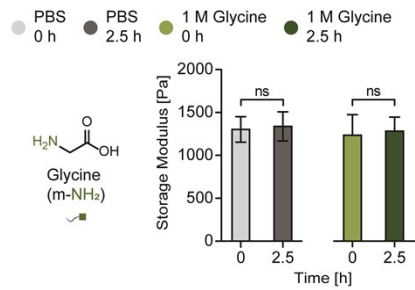

**Figure S26.** Stability of the indazolone bond confirmed by unchanged storage modulus upon 2.5 h exposure to excess of monofunctional amine (m-NH<sub>2</sub>, glycine).

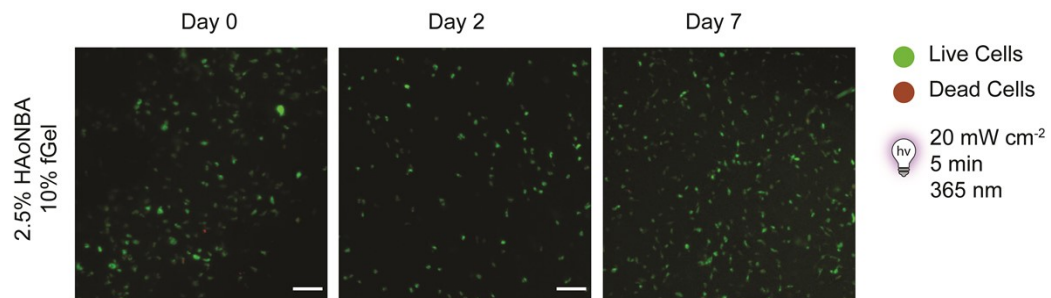

**Figure S27.** Live/dead assay for amine-*o*NBA bioresin (2.5 million cells mL<sup>-1</sup>, human neonatal dermal fibroblasts) showing excellent viability upon crosslinking (~92%) and after 2 (~97%) and 7 days (~99%) of culture (see also Figure 4B-II).
